# Supplementary material
Source: Elsevier journal article supplement (https://www.sciencedirect.com/science/article/pii/S2237936319300693)
Supplement: mmc1 [file S2237936319300693:mmc1.docx]

**Supplementary file of References of Nine studies of meta - analysis**

1. Ellis CT, et al. Evaluating Surveillance Patterns after Chemoradiation-Only Compared with Conventional Management for Older Patients with Rectal Cancer. J of the American College of Surgeons. 2019; 228(5):782-793. <https://doi.org/10.1016/j.jamcollsurg.2019.01.010>
2. Chapman W, et al. Total neoadjuvant therapy with short course radiation compared to concurrent chemoradiation in rectal cancer. Journal of Clinical Oncology. 2019; 37(4): 486-486. <https://doi.org/10.1200/JCO.2019.37.4_suppl.486>
3. Quezada-Diaz F, et al. Effect of Neoadjuvant Systemic Chemotherapy With or Without Chemoradiation on Bowel Function in Rectal Cancer Patients Treated With Total Mesorectal Excision. Journal of Gastrointestinal Surgery. 2019; 23(4):800-807. <https://doi.org/10.1007/s11605-018-4003-7>
4. Spiegel D, et al. Role of adjuvant chemotherapy following chemoradiation and surgery for locoregionally advanced rectal cancer: A Veterans Health Administration analysis. Journal of Clinical Oncology. 2018; 36(4):741-741. <https://doi.org/10.1200/JCO.2018.36.4_suppl.741>
5. Mancini R, et al. Tumor Regression Grade After Neoadjuvant Chemoradiation and Surgery for Low Rectal Cancer Evaluated by Multiple Correspondence Analysis: Ten Years as Minimum Follow-up. Clinical Colorectal Cancer. 2017;17(1):e13-19. <http://dx.doi.org/10.1016/j.clcc.2017.06.004>
6. Franke AJ, et al. Total Neoadjuvant Therapy: A Shifting Paradigm in Locally Advanced Rectal Cancer Management. Clinical Colorectal Cancer. 2017;17(1):1-12. <http://dx.doi.org/10.1016/j.clcc.2017.06.008>
7. Dossa F, et al. A watch-and-wait approach for locally advanced rectal cancer after a clinical complete response following neoadjuvant chemoradiation: a systematic review and meta-analysis. Lancet Gastroenterol Hepatol. 2017; 2(7): 501-513. <http://dx.doi.org/10.1016/S2468-1253(17)30074-2>
8. Kimberly P, et al. Complete Neoadjuvant Treatment for Rectal Cancer. American Journal of Clinical Oncology.2017; 40(3):283-287. <https://doi.org/10.1097/COC.0000000000000149>
9. Rodel C, et al. Rectal cancer: Neoadjuvant chemoradiotherapy. Best Practice & Research Clinical Gastroenterology. 2016; 30(4):629-639. <http://dx.doi.org/10.1016/j.bpg.2016.06.004>
